# Supplementary material
Source: PubMed Central journal article supplement (PMC6535601)
Supplement: JCM.00350-19-s0001.pdf [file JCM.00350-19-s0001.pdf]

**Beyond Fever and Pain: Diagnostic Methods for Chikungunya Virus**

Supplemental Material

Muktha S. Natrajan, Alejandra Rojas, and Jesse J. Waggoner

**Supplemental Table 1.** List of reviewed molecular assays for CHIKV.

| Method                    | Target                  | Lead Author     | Year                                                                                               | Features                                                                                              | Reference |
|---------------------------|-------------------------|-----------------|----------------------------------------------------------------------------------------------------|-------------------------------------------------------------------------------------------------------|-----------|
| <b>RT-PCR</b>             | E1/nsP1                 | Hasebe F.       | 2002                                                                                               | Two primer sets, performed as 2 monoplexes, only analytical evaluation reported                       | (1)       |
|                           | E1                      | Naresh C. V. M. | 2007                                                                                               | Designed for strain characterization                                                                  | (2)       |
|                           | E1                      | Lakshmi V.      | 2008                                                                                               | Developed and compared with RT-LAMP                                                                   | (3)       |
|                           | E1                      | Sharma S.       | 2010                                                                                               | Quantitative competitive assay, similar clinical performance to a SYBR Green rRT-PCR (Santhosh)       | (4)       |
|                           | E1                      | Reddy V.        | 2012                                                                                               | Less sensitive than rRT-PCR (Lanciotti) or RT-LAMP (Parida)                                           | (5)       |
|                           | E2                      | Dutta S. K.     | 2014                                                                                               | Used for strain characterization                                                                      | (6)       |
| <b>rRT-PCR</b>            | E1                      | Pastorino B.    | 2005                                                                                               | Evaluated without extraction, using culture supernatant, no clinical eval                             | (7)       |
|                           | E1                      | Edwards C.      | 2007                                                                                               | Analytical Sn > conventional and rRT-PCR (Pastorino) comparators, no clinical comparison with rRT-PCR | (8)       |
|                           | E1                      | Santhosh S. R.  | 2007                                                                                               | SYBR Green assay; analytical and clinical Sn > conventional RT-PCR using same primers                 | (9)       |
|                           | E1                      | Laurent P.      | 2007                                                                                               | LightCycler assay, with RNA internal control                                                          | (10)      |
|                           | nsP1/nsP4               | Lanciotti R. S. | 2007                                                                                               | 2 targets, nsP4 target used most commonly in studies by other investigators                           | (11)      |
|                           | nsP1                    | Panning M.      | 2008                                                                                               | Two assays developed for all strains and Indian Ocean strain; designed competitive internal control   | (12)      |
| nsP1                      | Published by Panning M. | 2009            | Evaluation of Altona RealStar Chikungunya rRT-PCR, Sn and Sp 100% vs published rRT-PCR (Panning)   | (13)                                                                                                  |           |
| nsP2                      | Chen H.                 | 2013            | DANP-coupled hairpin RT-PCR, similar clinical Sn to rRT-PCR (Pastorino)                            | (14, 15)                                                                                              |           |
| nsP3                      | Chiam C. W.             | 2013            | Assays for + and - strands; negative strand assay with lower Sn; not tested in clinical evaluation | (16)                                                                                                  |           |
| <b>Isothermal Methods</b> |                         |                 |                                                                                                    |                                                                                                       |           |
| <i>RT-LAMP</i>            | Not reported            | Lakshmi V.      | 2008                                                                                               | Appeared more sensitive than E1 RT-PCR, developed in this publication                                 | (3)       |
|                           | E1                      | Parida M. M.    | 2007                                                                                               | Clinical Sn > conventional RT-PCR, specificity evaluated vs. flaviviruses, not alphaviruses           | (17)      |
|                           | E1                      | Priye A.        | 2017                                                                                               | Multiplex RT-LAMP for ZIKV, CHIKV and DENV, used published assay (Parida), no clinical evaluation     | (18)      |
| <i>RT-NASBA</i>           | E1                      | Telles J.-N.    | 2009                                                                                               | Chimeric internal control, specific for CHIKV, appears as clinically sensitive at rRT-PCR (Laurent)   | (19)      |
| <i>RT-RPA</i>             | nsP1                    | Patel P.        | 2016                                                                                               | Perfect agreement vs 2 rRT-PCRs targeting E1 (described in manuscript)                                | (20)      |
| <b>Multiplex Methods</b>  | E1                      | Dash P. K.      | 2008                                                                                               | Duplex <b>conventional</b> RT-PCR with DENV                                                           | (21)      |
|                           | E1                      | Naze F.         | 2009                                                                                               | Duplex DENV-CHIKV, WNV & internal control (2nd reaction), used published CHIKV primers (Laurent)      | (22)      |
|                           | E1                      | Mishra B.       | 2011                                                                                               | Duplex <b>conventional</b> RT-PCR with DENV, used primers from literature (Naresh)                    | (23)      |
|                           | E1                      | Pongsiri P.     | 2012                                                                                               | Duplex DENV-CHIKV, similar Sn and Sp compared to conventional RT-PCR                                  | (24)      |
|                           | E1                      | Simmons M.      | 2016                                                                                               | Duplex DENV-CHIKV, Sn and Sp 100% vs isolation                                                        | (25)      |
|                           | E1                      | Wu W.           | 2018                                                                                               | ZIKV-DENV-YFV-CHIKV multiplex, evaluated with spiked samples                                          | (26)      |

|      |                |      |                                                                                                             |          |
|------|----------------|------|-------------------------------------------------------------------------------------------------------------|----------|
| E3   | Cecilia D.     | 2015 | Duplex DENV-CHIKV with $\beta$ -actin internal control, primers reported in literature                      | (27)     |
| nsP2 | Smith D. R.    | 2009 | Selected this ONNV duplex from multiple designs for ease of development, tested mosquito samples            | (28)     |
| nsP1 | Saha K.        | 2013 | Duplex <b>conventional</b> DENV-CHIKV RT-PCR, primers from Hasebe, et al; similar performance to monoplexes | (29)     |
| nsP3 | Chen H.        | 2015 | Duplex DENV-CHIKV, SYBR green assay, Sn 95.7% / Sp 100% compared to rRT-PCR (Pastorino)                     | (30)     |
| nsP4 | Pabbaraju K.   | 2016 | DENV-CHIKV-ZIKV, MGB hydrolysis probe-based assay, few clinical samples tested for CHIKV                    | (31)     |
| nsP2 | Waggoner J. J. | 2016 | Duplex DENV-CHIKV or triplex ZIKV-CHIKV-DENV, agreement 100% vs rRT-PCR vs. PAHO reference assay            | (32, 33) |
| nsP1 | Santiago G. A. | 2018 | Trioplex assay: DENV-CHIKV-ZIKV, evaluated with spiked samples and 13 clinical samples                      | (34)     |

Abbreviations: DANP, 2,7-diamino-1,8-naphthyridine derivative; MGB, minor groove binder; PAHO, Pan-American Health

Organization; Sn, sensitivity; Sp, specificity. All other abbreviatons as defined in the text.

## References

1. **Hasebe F, Parquet MC, Pandey BD, Mathenge EG, Morita K, Balasubramaniam V, Saat Z, Yusop A, Sinniah M, Natkunam S, Igarashi A.** 2002. Combined detection and genotyping of Chikungunya virus by a specific reverse transcription-polymerase chain reaction. *J Med Virol* **67**:370-374.
2. **Naresh Kumar CVM, Anthony Johnson AM, Sai Gopal DVR.** 2007. Molecular characterization of chikungunya virus from Andhra Pradesh, India & phylogenetic relationship with Central African isolates. *Indian J Med Res* **126**:534-540.
3. **Lakshmi V, Neeraja M, Subbalaxmi MV, Parida MM, Dash PK, Santhosh SR, Rao PV.** 2008. Clinical features and molecular diagnosis of Chikungunya fever from South India. *Clin Infect Dis* **46**:1436-1442.
4. **Sharma S, Dash PK, Santhosh SR, Shukla J, Parida M, Rao PV.** 2010. Development of a quantitative competitive reverse transcription polymerase chain reaction (QC-RT-PCR) for detection and quantitation of Chikungunya virus. *Mol Biotechnol* **45**:49-55.
5. **Reddy V, Ravi V, Desai A, Parida M, Powers AM, Johnson BW.** 2012. Utility of IgM ELISA, TaqMan real-time PCR, reverse transcription PCR, and RT-LAMP assay for the diagnosis of Chikungunya fever. *J Med Virol* **84**:1771-1778.
6. **Dutta SK, Pal T, Saha B, Mandal S, Tripathi A.** 2014. Copy number variation of Chikungunya ECSA virus with disease symptoms among Indian patients. *J Med Virol* **86**:1386-1392.
7. **Pastorino B, Bessaud M, Grandadam M, Murri S, Tolou HJ, Peyrefitte CN.** 2005. Development of a TaqMan RT-PCR assay without RNA extraction step for the detection and quantification of African Chikungunya viruses. *J Virol Methods* **124**:65-71.
8. **Edwards CJ, Welch SR, Chamberlain J, Hewson R, Tolley H, Cane PA, Lloyd G.** 2007. Molecular diagnosis and analysis of Chikungunya virus. *J Clin Virol* **39**:271-275.
9. **Santhosh SR, Parida MM, Dash PK, Pateriya A, Pattnaik B, Pradhan HK, Tripathi NK, Ambuj S, Gupta N, Saxena P, Lakshmana Rao PV.** 2007. Development and evaluation of SYBR Green I-based one-step real-time RT-PCR assay for detection and quantification of Chikungunya virus. *J Clin Virol* **39**:188-193.
10. **Laurent P, Le Roux K, Grivard P, Bertil G, Naze F, Picard M, Staikowsky F, Barau G, Schuffenecker I, Michault A.** 2007. Development of a sensitive real-time reverse transcriptase PCR assay with an internal control to detect and quantify chikungunya virus. *Clin Chem* **53**:1408-1414.
11. **Lanciotti RS, Kosoy OL, Laven JJ, Panella AJ, Velez JO, Lambert AJ, Campbell GL.** 2007. Chikungunya virus in US travelers returning from India, 2006. *Emerg Infect Dis* **13**:764-767.
12. **Panning M, Grywna K, van Esbroeck M, Emmerich P, Drosten C.** 2008. Chikungunya fever in travelers returning to Europe from the Indian Ocean region, 2006. *Emerg Infect Dis* **14**:416-422.
13. **Panning M, Hess M, Fischer W, Grywna K, Pfeiffer M, Drosten C.** 2009. Performance of the RealStar Chikungunya virus real-time reverse transcription-PCR kit. *J Clin Microbiol* **47**:3014-3016.
14. **Chen H, Takei F, Koay ES, Nakatani K, Chu JJ.** 2013. A novel DANP-coupled hairpin RT-PCR for rapid detection of Chikungunya virus. *J Mol Diagn* **15**:227-233.
15. **Chen H, Parimelalagan M, Takei F, Hapuarachchi HC, Koay ES, Ng LC, Ho PS, Nakatani K, Chu JJ.** 2016. Development of 2, 7-Diamino-1, 8-Naphthyridine (DANP) Anchored Hairpin Primers for RT-PCR Detection of Chikungunya Virus Infection. *PLoS Negl Trop Dis* **10**:e0004887.
16. **Chiam CW, Chan YF, Loong SK, Yong SS, Hooi PS, Sam IC.** 2013. Real-time polymerase chain reaction for diagnosis and quantitation of negative strand of chikungunya virus. *Diagn Microbiol Infect Dis* **77**:133-137.
17. **Parida MM, Santhosh SR, Dash PK, Tripathi NK, Lakshmi V, Mamidi N, Shrivastva A, Gupta N, Saxena P, Babu JP, Rao PV, Morita K.** 2007. Rapid and real-time detection of Chikungunya virus by reverse transcription loop-mediated isothermal amplification assay. *J Clin Microbiol* **45**:351-357.
18. **Priye A, Bird SW, Light YK, Ball CS, Negrete OA, Meagher RJ.** 2017. A smartphone-based diagnostic platform for rapid detection of Zika, chikungunya, and dengue viruses. *Sci Rep* **7**:44778.
19. **Telles JN, Le Roux K, Grivard P, Vernet G, Michault A.** 2009. Evaluation of real-time nucleic acid sequence-based amplification for detection of Chikungunya virus in clinical samples. *J Med Microbiol* **58**:1168-1172.
20. **Patel P, Abd El Wahed A, Faye O, Pruger P, Kaiser M, Thaloengsok S, Ubol S, Sakuntabhai A, Leparc-Goffart I, Hufert FT, Sall AA, Weidmann M, Niedrig M.** 2016. A Field-Deployable Reverse Transcription Recombinase Polymerase Amplification Assay for Rapid Detection of the Chikungunya Virus. *PLoS Negl Trop Dis* **10**:e0004953.
21. **Dash PK, Parida M, Santhosh SR, Saxena P, Srivastava A, Neeraja M, Lakshmi V, Rao PV.** 2008. Development and evaluation of a 1-step duplex reverse transcription polymerase chain reaction for differential diagnosis of chikungunya and dengue infection. *Diagn Microbiol Infect Dis* **62**:52-57.
22. **Naze F, Le Roux K, Schuffenecker I, Zeller H, Staikowsky F, Grivard P, Michault A, Laurent P.** 2009. Simultaneous detection and quantitation of Chikungunya, Dengue and West Nile viruses by multiplex RT-PCR assays and Dengue virus typing using high resolution melting. *J Virol Meth* **162**:1.
23. **Mishra B, Sharma M, Pujhari SK, Ratho RK, Gopal DS, Kumar CN, Sarangi G, Chayani N, Varma SC.** 2011. Utility of multiplex reverse transcriptase-polymerase chain reaction for diagnosis and serotypic characterization of dengue and chikungunya viruses in clinical samples. *Diagn Microbiol Infect Dis* **71**:118-125.
24. **Pongsiri P, Praianantathavorn K, Theamboonlers A, Payungporn S, Poovorawan Y.** 2012. Multiplex real-time RT-PCR for detecting chikungunya virus and dengue virus. *Asian Pac J Trop Med* **5**:342-346.

25. **Simmons M, Myers T, Guevara C, Jungkind D, Williams M, Houng HS.** 2016. Development and Validation of a Quantitative, One-Step, Multiplex, Real-Time Reverse Transcriptase PCR Assay for Detection of Dengue and Chikungunya Viruses. *J Clin Microbiol* **54**:1766-1773.
26. **Wu W, Wang J, Yu N, Yan J, Zhuo Z, Chen M, Su X, Fang M, He S, Zhang S, Zhang Y, Ge S, Xia N.** 2018. Development of multiplex real-time reverse-transcriptase polymerase chain reaction assay for simultaneous detection of Zika, dengue, yellow fever, and chikungunya viruses in a single tube. *J Med Virol* **90**:1681-1686.
27. **Cecilia D, Kakade M, Alagarasu K, Patil J, Salunke A, Parashar D, Shah PS.** 2015. Development of a multiplex real-time RT-PCR assay for simultaneous detection of dengue and chikungunya viruses. *Arch Virol* **160**:323-327.
28. **Smith DR, Lee JS, Jahrling J, Kulesh DA, Turell MJ, Groebner JL, O'Guinn ML.** 2009. Development of field-based real-time reverse transcription-polymerase chain reaction assays for detection of Chikungunya and O'nyong-nyong viruses in mosquitoes. *Am J Trop Med Hyg* **81**:679-684.
29. **Saha K, Firdaus R, Chakrabarti S, Sadhukhan PC.** 2013. Development of rapid, sensitive one-tube duplex RT-PCR assay for specific and differential diagnosis of Chikungunya and dengue. *J Virol Methods* **193**:521-524.
30. **Chen H, Parimelalagan M, Lai YL, Lee KS, Koay ES, Hapuarachchi HC, Ng LC, Ho PS, Chu JJ.** 2015. Development and Evaluation of a SYBR Green-Based Real-Time Multiplex RT-PCR Assay for Simultaneous Detection and Serotyping of Dengue and Chikungunya Viruses. *J Mol Diagn* **17**:722-728.
31. **Pabbaraju K, Wong S, Gill K, Fonseca K, Tipples GA, Tellier R.** 2016. Simultaneous detection of Zika, Chikungunya and Dengue viruses by a multiplex real-time RT-PCR assay. *J Clin Virol* **83**:66-71.
32. **Waggoner JJ, Ballesteros G, Gresh L, Mohamed-Hadley A, Tellez Y, Sahoo MK, Abeynayake J, Balmaseda A, Harris E, Pinsky BA.** 2016. Clinical evaluation of a single-reaction real-time RT-PCR for pan-dengue and chikungunya virus detection. *J Clin Virol* **78**:57-61.
33. **Waggoner JJ, Gresh L, Mohamed-Hadley A, Ballesteros G, Davila MJ, Tellez Y, Sahoo MK, Balmaseda A, Harris E, Pinsky BA.** 2016. Single-Reaction Multiplex Reverse Transcription PCR for Detection of Zika, Chikungunya, and Dengue Viruses. *Emerg Infect Dis* **22**:1295-1297.
34. **Santiago GA, Vazquez J, Courtney S, Matias KY, Andersen LE, Colon C, Butler AE, Roulo R, Bowzard J, Villanueva JM, Munoz-Jordan JL.** 2018. Performance of the Triplex real-time RT-PCR assay for detection of Zika, dengue, and chikungunya viruses. *Nat Commun* **9**:1391.
